# Supplementary material
Source: PubMed Central journal article supplement (PMC6461151)
Supplement: Supp_Fig1.pdf [file Supp_Fig1.pdf]

## Supplementary Data

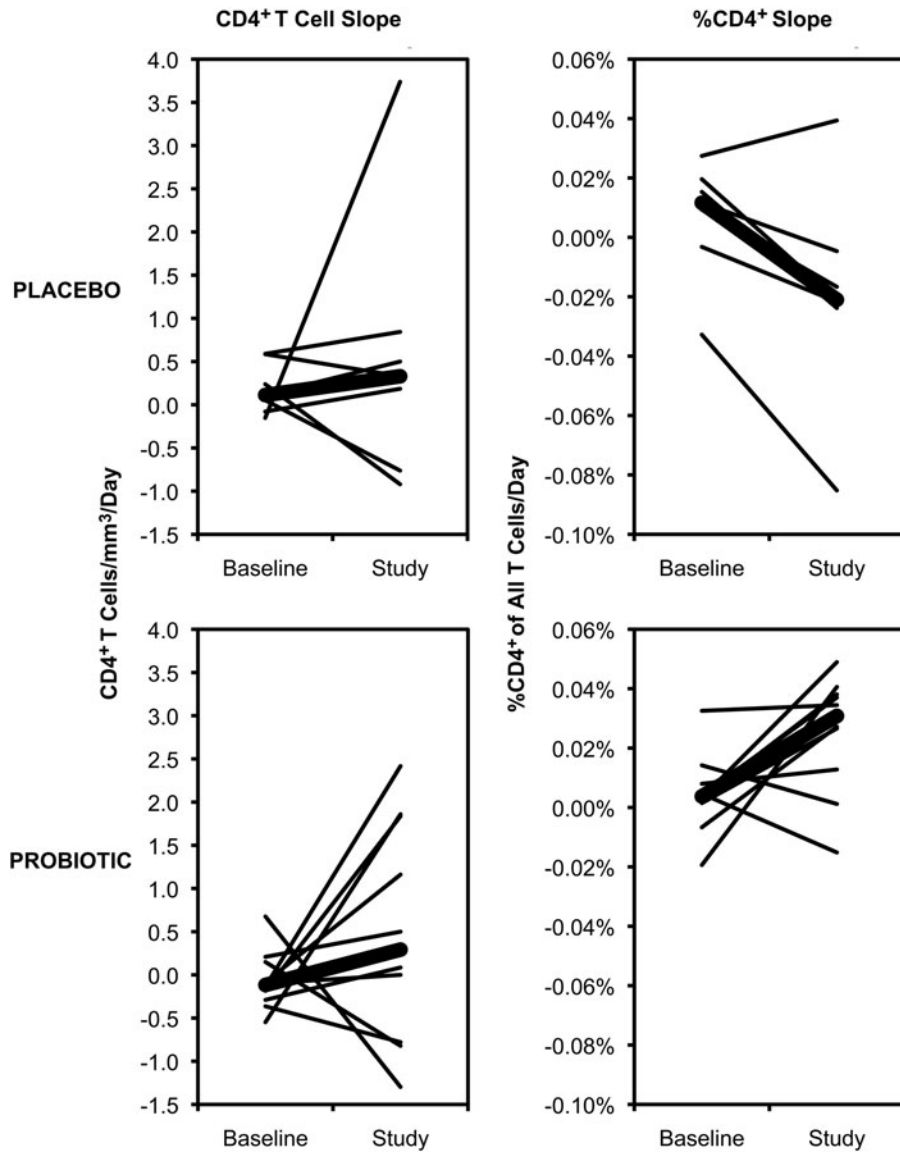

**SUPPLEMENTARY FIG. S1.** Slopes of blood CD4<sup>+</sup> T cell counts and percentages during the study compared to the prior year. The slopes of blood CD4<sup>+</sup> T cell counts and percentages ( $\Delta$ CD4<sup>+</sup> T cells/mm<sup>3</sup>/day and  $\Delta$ % CD4<sup>+</sup> T cells/day) at baseline (determined by three measurements in the prior year and the start of placebo or probiotic administration) and during the study (determined by measurements from the start to the end of placebo or probiotic administration) are plotted for placebo and probiotic groups. Each *thin line* represents an individual, and the *thick lines* indicate medians for each group.
