# Supplementary material
Source: PubMed Central journal article supplement (PMC6461151)
Supplement: Supp_Fig2.pdf [file Supp_Fig2.pdf]

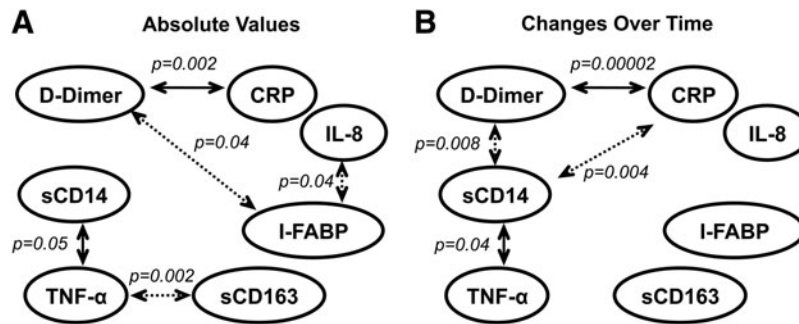

**SUPPLEMENTARY FIG. S2.** Correlations of proinflammatory blood biomarkers. Significant correlations (Spearman rank) between measurements at both time points (**A**) and changes between the start and end of placebo/probiotic administration (**B**) are indicated.
